# Supplementary material
Source: PubMed Central journal article supplement (PMC2577260)
Supplement: pp.108.127969_1.pdf [file pp.108.127969_1.pdf]

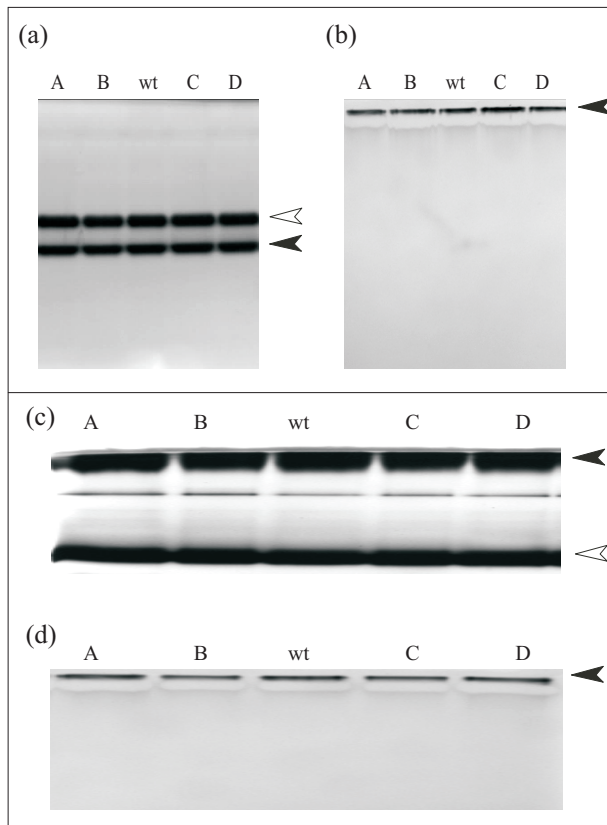

**Fig. 1. Phosphorylase patterns and DPE2 activity in the four transgenic potato lines.**

Extracts were prepared from leaves (a and b; 20  $\mu\text{g}$  protein per lane) or tubers (c and d; 15  $\mu\text{g}$  per lane). Following electrophoresis, gels were stained for phosphorylase (a and c) or DPE2 (b and d) activity. The separation gels contained 0.2 % [w/v] glycogen (b to d) or lacked any polyglucan (a). In a and c, the open and the closed arrows mark the position of the plastidial and cytosolic phosphorylase isozyme, respectively. In b and d, the band of the DPE2 activity is labeled with a closed arrow.
