# Supplementary material
Source: PubMed Central journal article supplement (PMC2577260)
Supplement: pp.108.127969_2.pdf [file pp.108.127969_2.pdf]

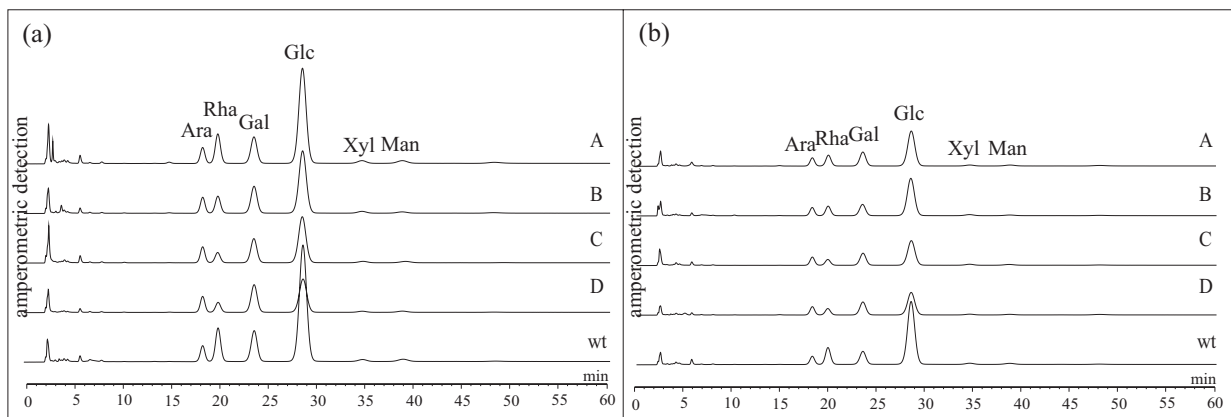

**Fig. 2. Monosaccharide patterns from the low molecular weight SHG fraction from leaves of cPGM-overexpressing (lines A and B) or underexpressing (C and D) potato lines.**

Leaves were harvested at the middle of the light (a) or of the dark (b) period. As a control, wild type leaves (wt) were harvested at the same time. The apparent size of the low molecular weight SHG fraction ranges from 1 to 10 kDa. Following acid hydrolysis, equal amounts of carbohydrates (4  $\mu$ g glucose equivalents) were analyzed by HPAEC-PAD. For (a) and (b) a typical chromatogram out of three independently performed preparations (two independent batches of plants) is presented. All chromatograms were normalized to Galactose. For the monosaccharides the following abbreviations were used: Ara – arabinose; Rha – rhamnose; Gal – galactose; Xyl – xylose; Man – mannose.
