# Supplementary material
Source: PubMed Central journal article supplement (PMC2577260)
Supplement: pp.108.127969_3.pdf [file pp.108.127969_3.pdf]

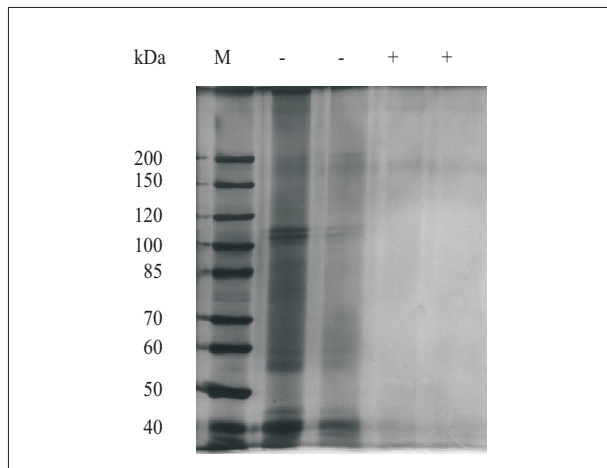

**Fig. 3. Removal of contaminating proteins from SHG<sub>L</sub> by proteinase K treatment.**

Aliquots (20  $\mu$ g glucose equivalents each) of two independent SHG<sub>L</sub> preparations were subjected to SDS-PAGE following denaturation. Samples were subjected to SDS-PAGE without (-) or following (+) treatment with proteinase K. Molecular weight markers were loaded in lane M. Proteins were visualized by silver staining.
