# Supplementary material
Source: PubMed Central journal article supplement (PMC2577260)
Supplement: pp.108.127969_4.pdf [file pp.108.127969_4.pdf]

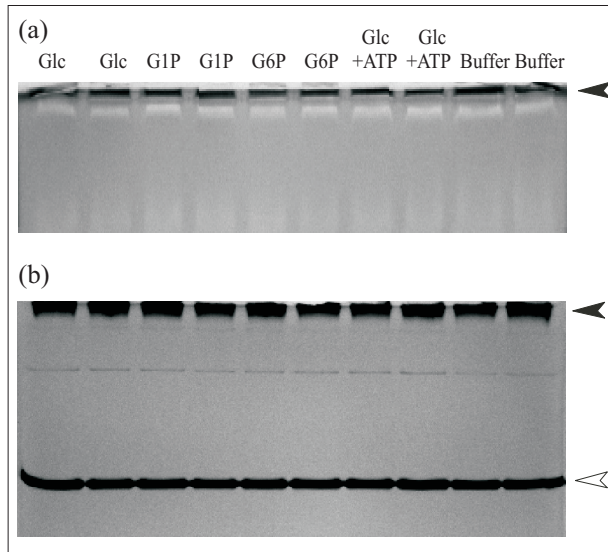

**Fig. 4. Phosphorylase patterns and DPE2 activity in tuber discs following incubation with various sugars or sugar derivatives.**

Proteins were extracted from potato tuber discs after 60 min incubation with the respective sugar or sugar derivatives. Equal amounts (5  $\mu$ g each) of buffer-soluble proteins each were applied to a native slab gel containing 0.2% [w/v] glycogen. Following electrophoresis the separation gel was stained for DPE2 (a) and Pho2 (b) activity, respectively.
